# Supplementary material
Source: PubMed Central journal article supplement (PMC2888449)
Supplement: supp_M109.089680_jbc.M109.089680-1.pdf [file supp_M109.089680_jbc.M109.089680-1.pdf]

**SUPPLEMENTAL DATA TO:**

**CRYSTAL STRUCTURE OF THE MINOR PILIN FCTB REVEALS DETERMINANTS OF  
GROUP A STREPTOCOCCAL PILUS ANCHORING\***

**Linke, Christian<sup>1,2</sup>, Paul G. Young<sup>1,2</sup>, Hae Joo Kang<sup>1,2</sup>, Richard D. Bunker<sup>1,2</sup>, Martin J.  
Middleditch<sup>1,2</sup>, Tom T. Caradoc-Davies<sup>4</sup>, Thomas Proft<sup>2,3</sup> and Edward N. Baker<sup>1,2</sup>**

<sup>1</sup>School of Biological Sciences, <sup>2</sup>Maurice Wilkins Centre for Molecular Biodiscovery and <sup>3</sup>School of Medical Sciences, University of Auckland, Private Bag 92019, Auckland 1142, New Zealand; <sup>4</sup>Australian Synchrotron, Clayton, Victoria 3168, Australia

Running title: Crystal structure of the minor pilin FctB

Address correspondence to: Edward N. Baker, School of Biological Sciences, Private Bag 92019, Auckland Mail Centre, Auckland 1142, New Zealand. Phone +64-9-373-7599. Fax +64-9-373-7414, E-mail: [ted.baker@auckland.ac.nz](mailto:ted.baker@auckland.ac.nz)

**TABLE S1**

**Isopeptide bond between Spy0130 and Spy0128.** Daughter ions of the fragmentation of the parent ion LGETEK<sub>146</sub>SELIFK and DFEVPT<sub>311</sub> ( $m/z$  694.68<sup>3+</sup>) which are covalently linked through Lys-146 and Thr-311.

| Observed (m/z) | Charge | Calculated (m/z) <sup>a</sup> | $\Delta_{\text{obs-calc}}$ | Proposed structure                                                         | Ion type                                   |
|----------------|--------|-------------------------------|----------------------------|----------------------------------------------------------------------------|--------------------------------------------|
| 147.11         | +1     | 147.11                        | 0                          | K                                                                          | y <sub>1</sub>                             |
| 171.12         | +1     | 171.11                        | +0.01                      | LG                                                                         | b <sub>2</sub>                             |
| 235.10         | +1     | 235.10                        | 0                          | DF (-CO)                                                                   | a <sub>2</sub> *                           |
| 263.10         | +1     | 263.10                        | 0                          | DF                                                                         | b <sub>2</sub> *                           |
| 294.18         | +1     | 294.18                        | 0                          | FK                                                                         | y <sub>2</sub>                             |
| 300.16         | +1     | 300.16                        | 0                          | LGE                                                                        | b <sub>3</sub>                             |
| 392.13         | +1     | 392.15                        | -0.02                      | DFE                                                                        | b <sub>3</sub> *                           |
| 407.25         | +1     | 407.27                        | -0.02                      | IFK                                                                        | y <sub>3</sub>                             |
| 491.20         | +1     | 491.21                        | -0.01                      | DFEV                                                                       | b <sub>4</sub> *                           |
| 520.35         | +1     | 520.35                        | 0                          | LIFK                                                                       | y <sub>4</sub>                             |
| 530.23         | +1     | 530.25                        | -0.02                      | LGETE                                                                      | b <sub>5</sub>                             |
| 588.24         | +1     | 588.27                        | -0.03                      | DFEVP                                                                      | b <sub>5</sub> *                           |
| 694.68         | +3     | 694.70                        | -0.02                      | LGETEKSELIFK and DFEVPT (-H <sub>2</sub> O) <sup>b,c</sup>                 | parent                                     |
| 697.36         | +2     | 697.38                        | -0.02                      | LGETEKSELIFK                                                               | parent-b <sub>6</sub> *                    |
| 736.38         | +1     | 736.42                        | -0.04                      | SELIFK                                                                     | y <sub>6</sub>                             |
| 747.87         | +2     | 747.91                        | -0.04                      | LGETEKSELIFK and T (-H <sub>2</sub> O) <sup>b</sup>                        | parent-b <sub>5</sub> *                    |
| 787.40         | +2     | 787.44                        | -0.04                      | LGETEKSELIFK and PT (-H <sub>2</sub> O <sup>b</sup> , -H <sub>2</sub> O)   | parent-b <sub>4</sub> * - H <sub>2</sub> O |
| 796.39         | +2     | 796.44                        | -0.05                      | LGETEKSELIFK and PT (-H <sub>2</sub> O) <sup>b</sup>                       | parent-b <sub>4</sub> *                    |
| 845.95         | +2     | 845.98                        | -0.03                      | LGETEKSELIFK and VPT (-H <sub>2</sub> O) <sup>b</sup>                      | parent-b <sub>3</sub> *                    |
| 856.43         | +1     | 856.45                        | -0.02                      | LGETEK and PT (-H <sub>2</sub> O) <sup>b</sup>                             | parent-y <sub>6</sub> -b <sub>4</sub> *    |
| 901.47         | +2     | 901.50                        | -0.03                      | LGETEKSELIFK and EVPT (-H <sub>2</sub> O <sup>b</sup> , -H <sub>2</sub> O) | parent-b <sub>2</sub> * - H <sub>2</sub> O |
| 910.47         | +2     | 910.50                        | -0.03                      | LGETEKSELIFK and EVPT (-H <sub>2</sub> O) <sup>b</sup>                     | parent-b <sub>2</sub> *                    |
| 1072.46        | +1     | 1072.52                       | -0.06                      | LGETEKSE and PT (-H <sub>2</sub> O) <sup>b</sup>                           | parent-y <sub>4</sub> -b <sub>4</sub> *    |
| 1185.55        | +1     | 1185.61                       | -0.06                      | LGETEKSEL and PT (-H <sub>2</sub> O) <sup>b</sup>                          | parent-y <sub>3</sub> -b <sub>4</sub> *    |
| 1298.62        | +1     | 1298.69                       | -0.07                      | LGETEKSELI and PT (-H <sub>2</sub> O) <sup>b</sup>                         | parent-y <sub>2</sub> -b <sub>4</sub> *    |
| 1445.64        | +1     | 1445.76                       | -0.12                      | LGETEKSELIF and PT (-H <sub>2</sub> O) <sup>b</sup>                        | parent-y <sub>1</sub> -b <sub>4</sub> *    |
| 1591.74        | +1     | 1591.86                       | -0.12                      | LGETEKSELIFK and PT (-H <sub>2</sub> O) <sup>b</sup>                       | parent-b <sub>4</sub> *                    |

<sup>a</sup>Monoisotopic mass, calculated using the web server

<http://db.systemsbiochemistry.net:8080/proteomicsToolkit/FragIonServlet.html>

<sup>b</sup>Loss of a water molecule to the covalent intersubunit linkage.

<sup>c</sup>Unfragmented parent ion.

**TABLE S2**

**C-terminal sequences preceding the sortase motif of pilin proteins.** Sequences are shown for the pilin proteins from *Streptococcus pyogenes*, *S. agalactiae* and *Corynebacterium diphtheriae*. The sortase motifs are highlighted in bold face and proline residues in red.

| <i>Streptococcus pyogenes</i> M1 strain SF370             |                                                     |                                        |
|-----------------------------------------------------------|-----------------------------------------------------|----------------------------------------|
| Spy_0125 <sup>1</sup>                                     | NATVSKTGITSDETLAFENNKEP <b>VVPTG</b>                | Minor pilin, tip                       |
| Spy_0128 <sup>2</sup>                                     | STEQETSTDKDMTITFTNKKDFE <b>VPTG</b>                 | Major pilin                            |
| Spy0130 <sup>3</sup>                                      | <b>PEPHQP</b> DTTEKEK <b>PQ</b> KKRNGIL <b>PSTG</b> | Minor pilin, cell wall anchor          |
| <i>Streptococcus pyogenes</i> serotype M3 MGAS315         |                                                     |                                        |
| Cpa <sup>4</sup>                                          | KATKASVKEDETVAFENRKDL <b>VPTG</b>                   | Minor pilin, tip                       |
| FctA <sup>5</sup>                                         | KTDESADEIVVTNKRDT <b>QVPTG</b>                      | Major pilin                            |
| FctB <sup>6</sup>                                         | <b>VKPIPPRQP</b> NIP <b>KTPLPLAG</b>                | Minor pilin, putative cell wall anchor |
| <i>Streptococcus pyogenes</i> serotype M5 strain Manfredo |                                                     |                                        |
| Cpa <sup>7</sup>                                          | SASENVTADKEVTFENRKDL <b>VPTG</b>                    | Minor pilin, tip                       |
| FctA <sup>8</sup>                                         | KTDESADEIVVTNKRDT <b>QVPTG</b>                      | Major pilin                            |
| FctB <sup>9</sup>                                         | <b>VKPIPPRQP</b> NIP <b>KTPLPLAG</b>                | Minor pilin, putative cell wall anchor |
| <i>Streptococcus agalactiae</i> strain NEM316             |                                                     |                                        |
| PilA <sup>10</sup>                                        | EEGDKHLITNTHI <b>PPKGIIP</b> MTG                    | Minor pilin, tip                       |
| PilB <sup>11</sup>                                        | IAYDKGSVKKDAQVQNKKV <b>TIPQ</b> TG                  | Major pilin                            |
| PilC <sup>12</sup>                                        | ET <b>PPPTNPKPSQ</b> PL <b>FPQSFLPK</b> TG          | Minor pilin, cell wall anchor          |
| <i>Streptococcus agalactiae</i> strain 2603V/R            |                                                     |                                        |
| GBS52 <sup>13</sup>                                       | <b>VTPK</b> V <b>PSR</b> GGL <b>IPK</b> TG          | Minor pilin (Seq. ident. 29 % to PilC) |
| GBS80 <sup>14</sup>                                       | DITVDSADAT <b>PDTIK</b> NNKR <b>PSIP</b> NTG        | Major pilin (Seq. ident. 22 % to PilB) |
| GBS104 <sup>15</sup>                                      | IGYLEGNGKHLITNT <b>PKRPP</b> GV <b>FPK</b> TG       | Minor pilin (Seq. ident. 43% to PilA)  |

|                      |                                    |                               |
|----------------------|------------------------------------|-------------------------------|
| GBS59 <sup>16</sup>  | DYVANSNQKDATRVENKKVT <b>IPQ</b> TG | Major pilin                   |
| GBS67 <sup>17</sup>  | YHEEGDKHLITNTH <b>IPPKGIIP</b> MTG | Minor pilin                   |
| GBS150 <sup>18</sup> | ET <b>PPPTNPKPSQPLFPQSFLPK</b> TG  | Minor pilin, cell wall anchor |

---

***Corynebacterium diphtheriae* strain NCTC 13129**

---

|                    |                                                                  |                                  |
|--------------------|------------------------------------------------------------------|----------------------------------|
| SpaA <sup>19</sup> | NESTNVLVEQKVKIDNKKKNAGFEL <b>PL</b> TG                           | Major pilin                      |
| SpaB <sup>20</sup> | <b>PGAPNVPSVPSPPSVTSPAPKKTPPRLA</b> FTG                          | Minor pilin, cell wall anchor    |
| SpaC <sup>21</sup> | SGLITVEHP <b>QGKPWL</b> IKVANVSASTL <b>PL</b> TG                 | Minor pilin, tip                 |
| SpaD <sup>22</sup> | KDKFEGDDEVTLVSEIKNIKQGT <b>PKLP</b> MTG                          | Pilin, major pilin               |
| SpaE <sup>23</sup> | <b>PSTPPP</b> GHT <b>PPLRETP</b> GSGDEKEREQGD <b>LAL</b> TG      | Pilin, putative cell wall anchor |
| SpaF <sup>24</sup> | SGQVQAKGEGDKMILTVADTTAGEL <b>PK</b> TG                           | Pilin                            |
| SpaG <sup>25</sup> | FTISKNGEEIVAGAFKNELGKGV <b>KLPL</b> TG                           | Pilin                            |
| SpaH <sup>26</sup> | AVKIGQTATTTYDAKVENVKRDT <b>PDLPL</b> TG                          | Pilin, major pilin               |
| SpaI <sup>27</sup> | <b>VP</b> GT <b>PKTPGK</b> PDL <b>PEKFR</b> KEVTDRLG <b>NT</b> G | Pilin, putative cell wall anchor |

---

NCBI accession numbers: <sup>1</sup>BAC20340.1, <sup>2</sup>NP\_268517.1, <sup>3</sup>NP\_268519.1, <sup>4</sup>NP\_663902.1, <sup>5</sup>NP\_663904.1, <sup>6</sup>NP\_663906.1, <sup>7</sup>YP\_001127700.1, <sup>8</sup>YP\_001127702.1, <sup>9</sup>YP\_001127704.1, <sup>10</sup>NP\_735915.1, <sup>11</sup>NP\_735914.1, <sup>12</sup>NP\_735911.1, <sup>13</sup>NP\_687666.1, <sup>14</sup>NP\_687665.1, <sup>15</sup>NP\_687669.1, <sup>16</sup>NP\_688405.1, <sup>17</sup>NP\_688406.1, <sup>18</sup>NP\_688402.1, <sup>19</sup>NP\_940344.1, <sup>20</sup>NP\_940342.1, <sup>21</sup>NP\_940341.1, <sup>22</sup>NP\_938626.1, <sup>23</sup>NP\_938628.1, <sup>24</sup>NP\_938629.1, <sup>25</sup>NP\_940534.1, <sup>26</sup>NP\_940533.1, <sup>27</sup>NP\_940530.1

## FIGURE LEGENDS

FIGURE S1. **Superimposition of the hydrophobic core of FctB (turquoise) and the N-terminal domain of the major pilin Spy0128 (3B2M, brown) in a stereoview.** Sidechains of residues of the hydrophobic core are drawn in a stick diagram.

FIGURE S2. **Circular dichroism (CD) spectra of FctB and Spy0130.** The final spectra are the average of 5 measurements.

FIGURE S3. **Sequence alignment of FctB from *S. pyogenes* strain 90/306S (cloned in this work) with the mature form of Spy0130 from strain SF370 (UniProt identifier Q9A1S0).** N15 and Q69 participating in a hydrogen bridge in the hydrophobic core are highlighted by boxes, K110 by a grey box. Sequences were aligned using ClustalW.

## FIGURES

### FIGURE S1:

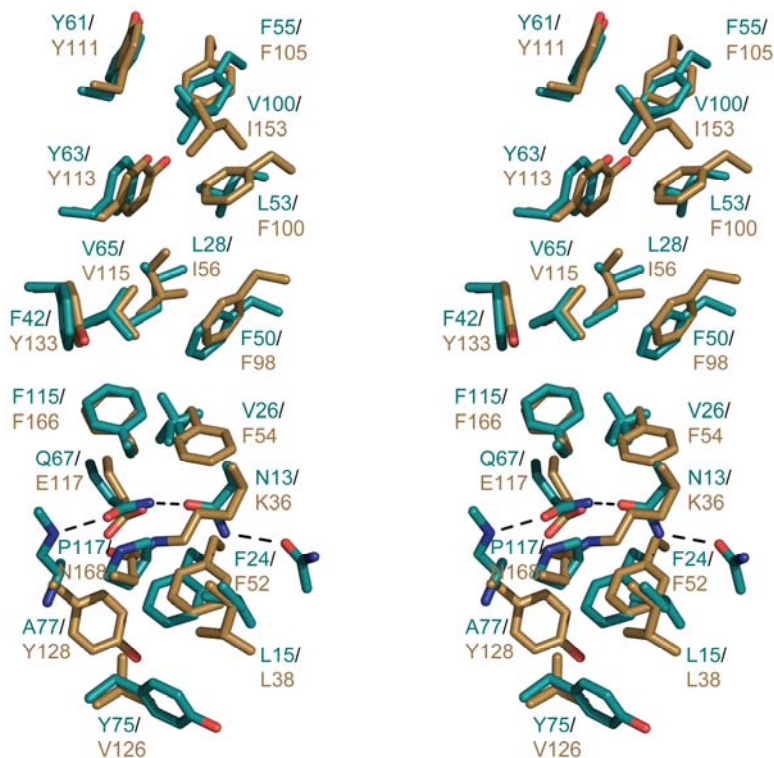

FIGURE S2:

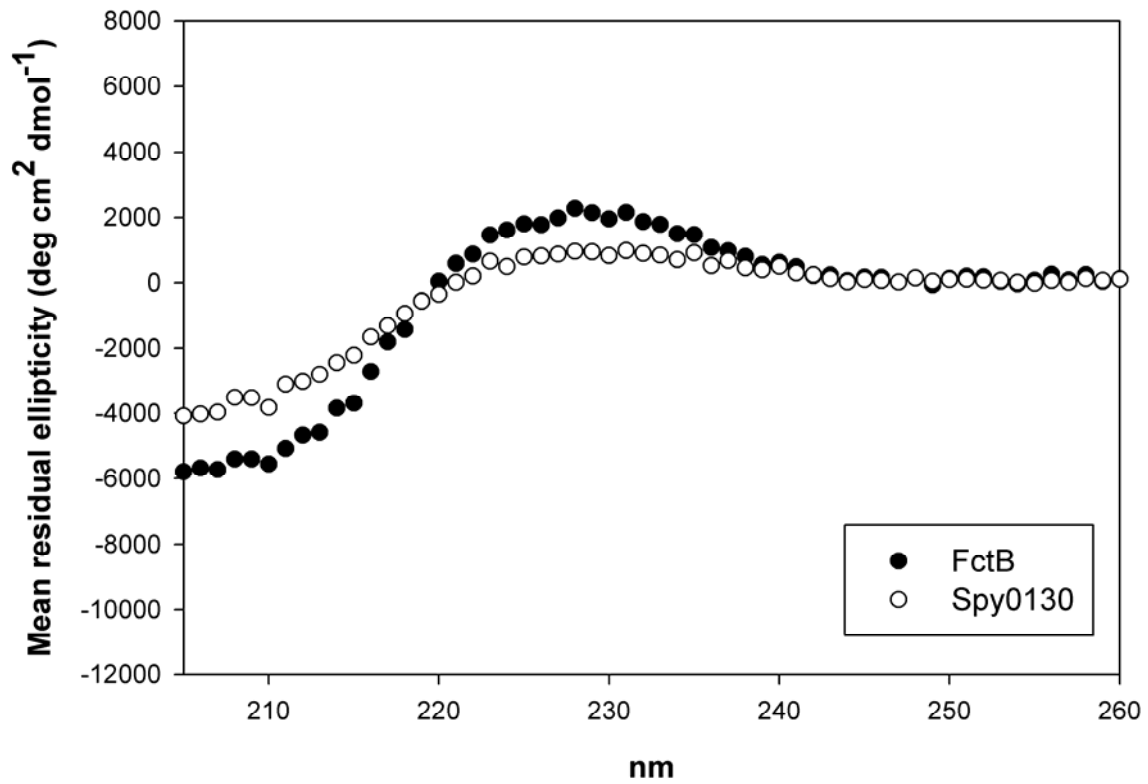

FIGURE S3:

```

FctB      KDSTVQTSISVENVLERAGDSTP-----FSVALESID---AMKTIEEITIAGSGKASFS 51
Spy0130   ENLTASINIEVINQVDVA1TNKQSSDIETFMFVIEALDKRESPLNSVTTTSVKGNGKTSFE 60
          :: *.. .*.* *1 :: * .. . * ..**:* * .. . :: *.**:**.

FctB      PL1F1TTVGQYTYRVY1QKPSQNKDYQADTTVFDVLVYV1TYDED-GTLVAKVISRRAGDEEK 110
Spy0130   QL1F1SEVGGYHYKIH1QLLGKNSQYHYDET1VYEVV1IYVLYNEQSGALETNLVS1NKLG1ETEK 120
          ***: **** *1 :: *1 ..**:* * **:*:*:* *1 *1 *1 *1 *1 *1 *1 *1 *1 *1 *1

FctB      SA1TFKPKRLVKPIPPRQPDFPKTP-----LPLA 139
Spy0130   SELIFKQ1EYSEKTPEPHQ1PD1TTEKEK1POK1KRNGILPST 158
          * : ** : * . *1 :*** .. . *
    
```
